# Supplementary material for: Structure and regulation of the cellulose degradome in Clostridium cellulolyticum
Source: PubMed Central journal article supplement (PMC3656788; doi:10.1186/1754-6834-6-73), 2013-05-08

**A**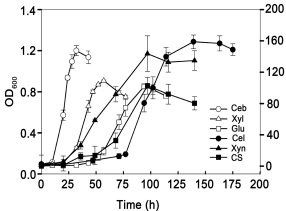**B**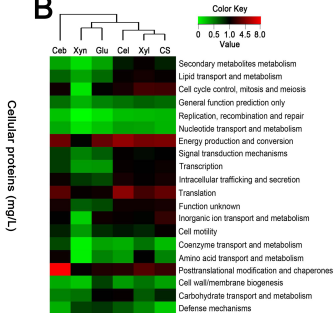

Supplement: 1754-6834-6-73-S2.pdf [file 1754-6834-6-73-S2.pdf]
