# Supplementary material for: Structure and regulation of the cellulose degradome in Clostridium cellulolyticum
Source: PubMed Central journal article supplement (PMC3656788; doi:10.1186/1754-6834-6-73), 2013-05-08
Supplement: 1754-6834-6-73-S6.pdf [file 1754-6834-6-73-S6.pdf]

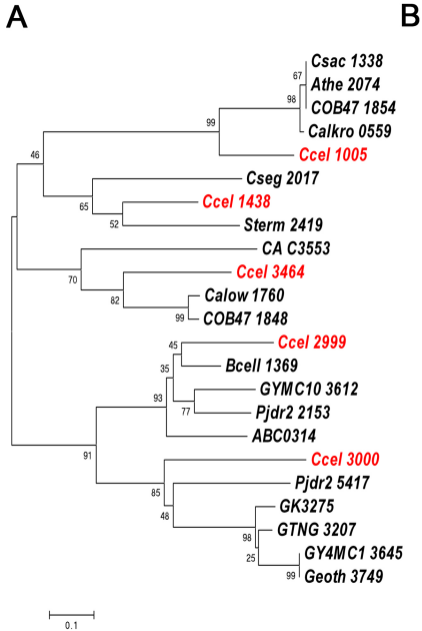

**B**

| Organism                                    | Gene ID        | Putative cre site | Consensus logo |
|---------------------------------------------|----------------|-------------------|----------------|
| <i>Caldicellulosiruptor obsidiansis</i>     | COB47_1854     | AGTAAAACGTTTAGAT  |                |
| <i>Caldicellulosiruptor bescii</i>          | Athe_2074      | TGTAAAACGTTTAGCA  |                |
|                                             | Athe_2075      | AGCTAAACGTTTCACA  |                |
| <i>Caldicellulosiruptor saccharolyticus</i> | Csac_1338      | TGTGAAACGTTTAGCA  |                |
|                                             | Csac_1339      | AGCTAAACGTTTCACA  |                |
| <i>Caldicellulosiruptor kronotskyensis</i>  | Kalkro_0559    | AGTAAAACGTTTAGTT  |                |
|                                             | Kalkro_0560    | AGCTAAACGTTTAATT  |                |
| <i>Clostridium cellulolyticum</i>           | Ccel_1005      | AGTTAAACGTTTTGCG  |                |
|                                             | Ccel_1006      | AGCTAAACGTTTAGCC  |                |
| <i>Caulobacter segnis</i>                   | Cseg_2017      | ATGGTAACGTTACCGT  |                |
| <i>Clostridium cellulolyticum</i>           | Ccel_1438      | ATGGGAACGTTCCCAA  |                |
|                                             | Ccel_1439      | ATGGGAACGTTCCCAA  |                |
| <i>Sebaldella termitidis</i>                | Sterm_2419     | ATGAGAACGTTCCCGA  |                |
| <i>Paenibacillus sp. JDR-2</i>              | Pjdr2_5417     | TTTGTAACGTTACAAT  |                |
| <i>Geobacillus thermodenitrificans</i>      | GTNG_3207      | TTTGTAACGTTACAAT  |                |
| <i>Geobacillus kaustophilus</i>             | GK_3275        | ATTGTAACGTTACAAT  |                |
| <i>Geobacillus sp. Y4.1MC1</i>              | GY4MC1_3645    | TTTGTAACGTTACATT  |                |
| <i>Geobacillus thermoglucosidasius</i>      | Geoth_3749     | TTTGTAACGTTACATT  |                |
| <i>Clostridium cellulolyticum</i>           | Ccel_2997      | AGCTTAACGTTAATCA  |                |
| <i>Bacillus cellulosilyticus</i>            | Bcell_1369     | TAGTCAACGTTAACTT  |                |
| <i>Bacillus clausii</i>                     | ABC0314        | ACTTTATCGTTAAACT  |                |
|                                             | ABC0315        | ACTTAAACGTTAACTT  |                |
| <i>Paenibacillus sp. JDR-2</i>              | Pjdr2_2153     | AGGTTAACGATAAACA  |                |
| <i>Geobacillus sp. Y412MC10</i>             | GYMC10_3612    | AGGTTAACGATAACTT  |                |
| <i>Clostridium acetobutylicum</i>           | CA_C3553       | AGTATAACGTTGTACC  |                |
| <i>Clostridium cellulolyticum</i>           | Ccel_3464/3463 | ACGATAACGCTATTTTC |                |
| <i>Caldicellulosiruptor owensensis</i>      | Calow_1760     | ATTGTAACGTTGTAGC  |                |
| <i>Caldicellulosiruptor obsidiansis</i>     | COB47_1848     | ATTGTAACGTTACAGC  |                |
